# Supplementary material for: The application of a bee glue-modified sensor in daclatasvir dual effect detection
Source: Royal Society of Chemistry journal article supplement (doi:10.1039/c7nj01517h), 2017-01-01
Supplement: c7nj01517h1.pdf [file c7nj01517h1.pdf]

### Supplementary material

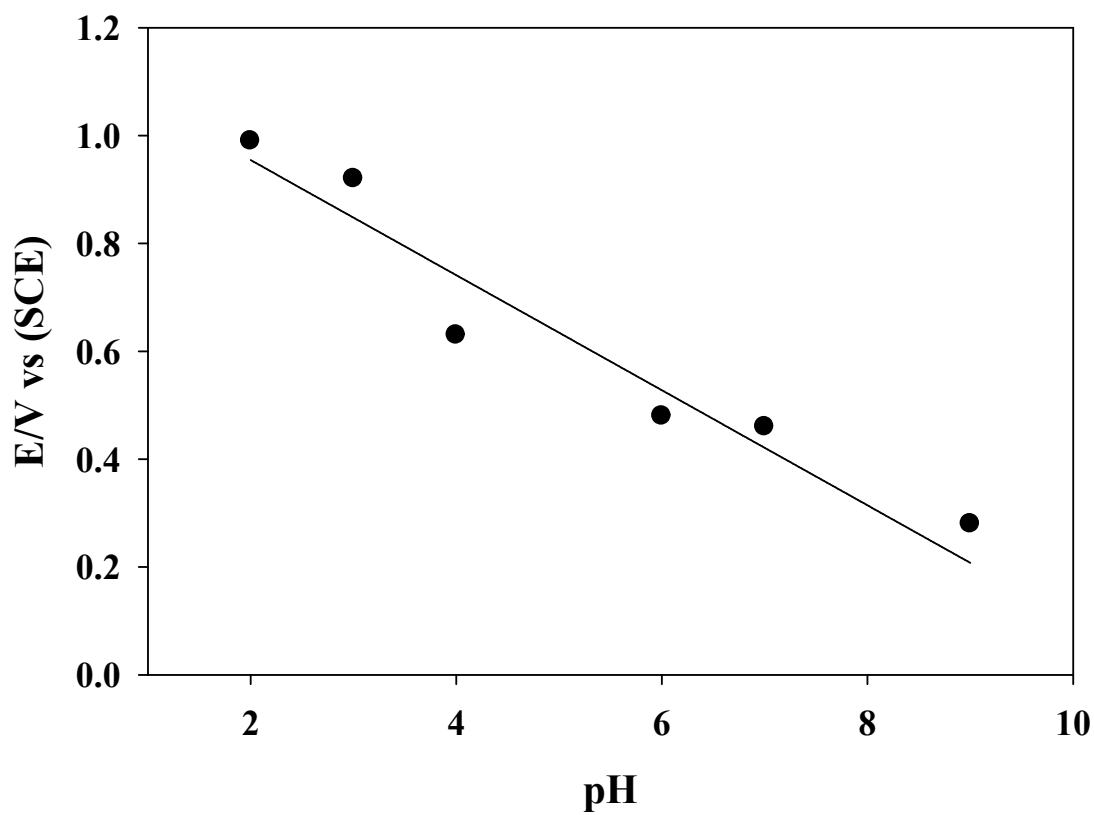

**Fig. 1.** The relation between anodic peak potential of DAC and pH values

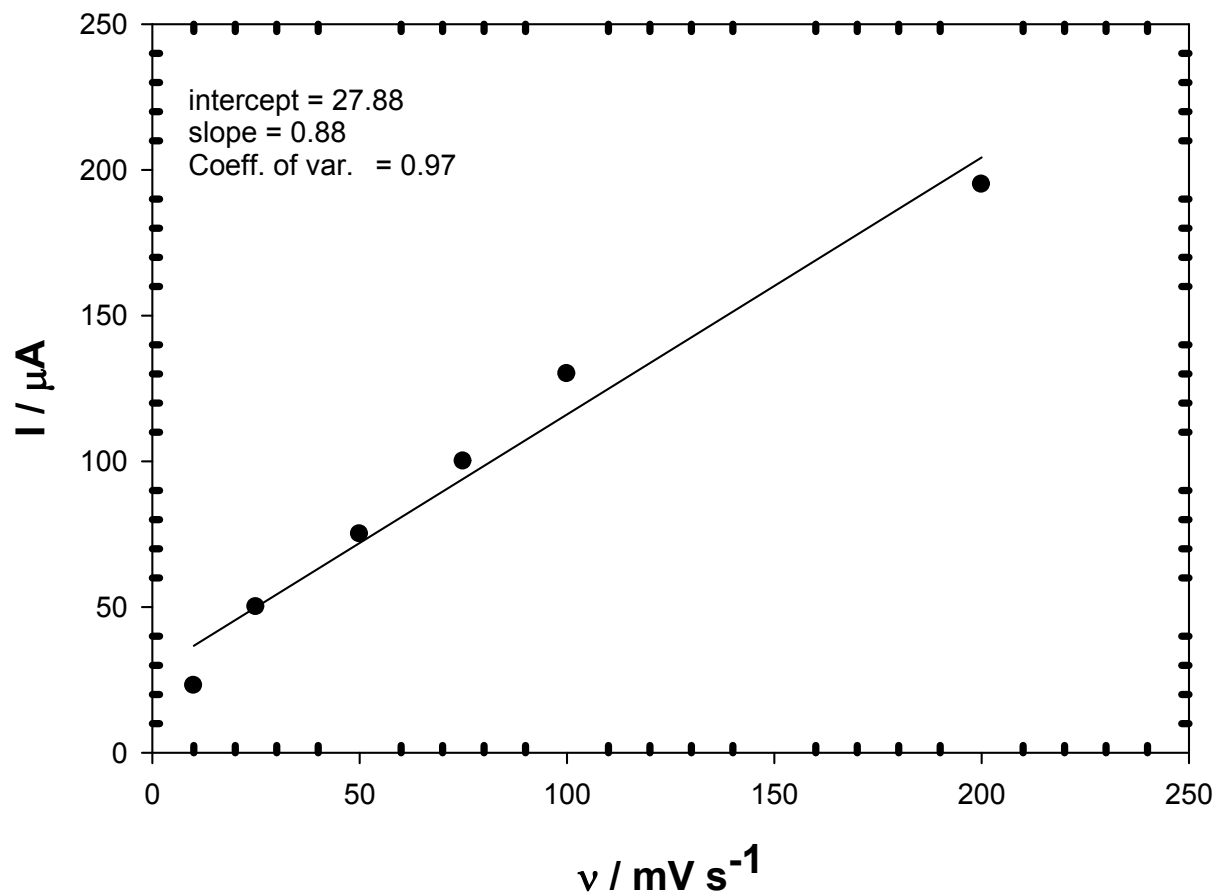

**Fig. 2.** The relation between anodic peak current and the scan rate.

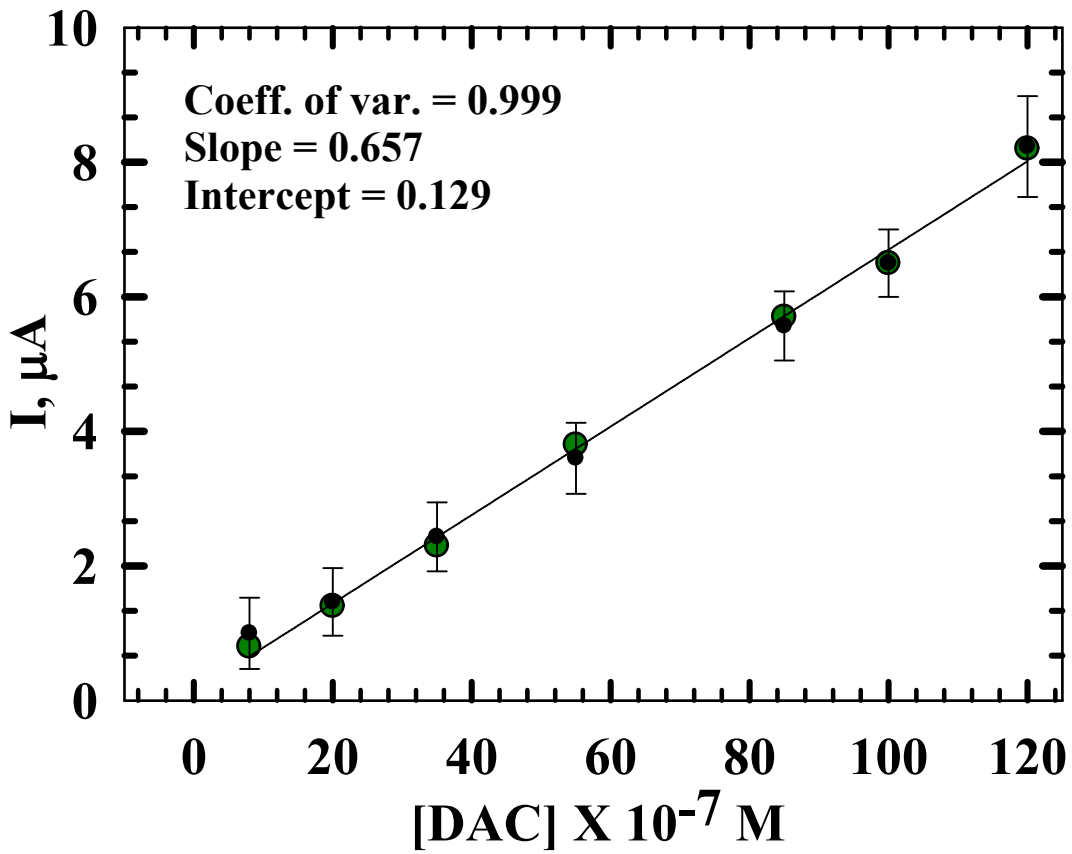

**Fig 3.** Calibration curve of DAC in urine.

**Table 1.** Accuracy and precision estimation for the proposed method of DAC determination in urine aliquot

| <b>[DAC] added</b><br><b>(M) x 10<sup>-7</sup></b> | <b>[DAC] Found<sup>a</sup></b><br><b>(M) x 10<sup>-7</sup></b> | <b>Recovery</b><br><b>(%)</b> | <b>SD</b><br><b>x 10<sup>-6</sup></b> | <b>S.E<sup>b</sup></b><br><b>x 10<sup>-6</sup></b> | <b>C.L.<sup>c</sup></b><br><b>x 10<sup>-6</sup></b> |
|----------------------------------------------------|----------------------------------------------------------------|-------------------------------|---------------------------------------|----------------------------------------------------|-----------------------------------------------------|
| 5.00                                               | 5.05                                                           | 101.0                         | 1.11                                  | 0.50                                               | 1.38                                                |
| 50.0                                               | 50.09                                                          | 100.1                         | 0.51                                  | 0.60                                               | 1.81                                                |
| 75.0                                               | 74.66                                                          | 99.54                         | 4.39                                  | 1.96                                               | 5.45                                                |
| 100.0                                              | 99.18                                                          | 99.18                         | 9.91                                  | 4.43                                               | 10.2                                                |

<sup>a</sup> mean for five determinations

<sup>b</sup>Standard error = SD/√n

<sup>c</sup> C.L. confidence at 95%confidence level and 4 degrees of freedom (t=2.776)
